# Supplementary material
Source: PubMed Central journal article supplement (PMC8542150)
Supplement: gox-9-e3890-s001.pdf [file gox-9-e3890-s001.pdf]

**SDC 1**

| <b>Variable</b>                         | <b>n</b> | <b>Age; Median [IQR]</b> | <b>p-value</b> |
|-----------------------------------------|----------|--------------------------|----------------|
| <b><i>Lifestyle changes</i></b>         |          |                          |                |
| <b>Video conferencing, social</b>       |          |                          | 0.231          |
| Significantly Decreased                 | 1        | 23.00 [23.00, 23.00]     |                |
| Decreased                               | 2        | 40.00 [40.00, 40.00]     |                |
| No Change                               | 9        | 28.00 [26.00, 45.00]     |                |
| Increased                               | 21       | 29.00 [26.00, 35.00]     |                |
| Significantly Increased                 | 28       | 27.00 [23.75, 32.25]     |                |
| <b>Video conferencing, occupational</b> |          |                          | 0.318          |
| Decreased                               | 2        | 40.00 [40.00, 40.00]     |                |
| No Change                               | 12       | 27.00 [26.00, 31.50]     |                |
| Increased                               | 18       | 28.00 [24.25, 33.75]     |                |
| Significantly Increased                 | 27       | 29.00 [25.00, 35.00]     |                |
| <b>Level of exercise</b>                |          |                          | 0.404          |
| Significantly Decreased                 | 9        | 26.00 [25.00, 29.00]     |                |
| Decreased                               | 17       | 29.00 [22.00, 40.00]     |                |
| No Change                               | 15       | 27.00 [23.50, 33.00]     |                |
| Increased                               | 18       | 30.00 [25.50, 34.25]     |                |
| Significantly Increased                 | 3        | 35.00 [33.50, 36.00]     |                |
| <b>Maintenance of a healthy diet</b>    |          |                          | 0.855          |
| Significantly Decreased                 | 6        | 25.50 [25.00, 36.50]     |                |
| Decreased                               | 14       | 27.50 [22.75, 30.75]     |                |

|                                                                            |    |                      |       |
|----------------------------------------------------------------------------|----|----------------------|-------|
| No Change                                                                  | 22 | 28.50 [26.00, 31.50] |       |
| Increased                                                                  | 15 | 32.00 [24.50, 37.00] |       |
| Significantly Increased                                                    | 4  | 32.50 [28.50, 35.50] |       |
| <b>Personal budget (recreational)</b>                                      |    |                      | 0.698 |
| Significantly Decreased                                                    | 5  | 25.00 [25.00, 40.00] |       |
| Decreased                                                                  | 15 | 29.00 [26.50, 31.50] |       |
| No Change                                                                  | 22 | 29.00 [24.25, 37.00] |       |
| Increased                                                                  | 13 | 30.00 [27.00, 35.00] |       |
| Significantly Increased                                                    | 4  | 25.50 [24.50, 26.75] |       |
| <b><i>Social media usage during COVID-19</i></b>                           |    |                      |       |
| <b>Overall frequency</b>                                                   |    |                      | 0.079 |
| Decreased                                                                  | 3  | 40.00 [31.50, 40.00] |       |
| No Change                                                                  | 7  | 33.00 [30.00, 41.00] |       |
| Increased                                                                  | 25 | 29.00 [25.00, 35.00] |       |
| Significantly Increased                                                    | 26 | 26.00 [24.25, 31.50] |       |
| <b>Average no. of hours spent on social media per week</b>                 |    |                      | 0.185 |
| <5 hours                                                                   | 34 | 27.50 [23.50, 32.50] |       |
| 5-10 hours                                                                 | 10 | 25.50 [24.00, 29.75] |       |
| 10-15 hours                                                                | 7  | 35.00 [27.50, 39.00] |       |
| >15 hours                                                                  | 11 | 32.00 [26.50, 37.00] |       |
| <b><i>Safety concerns</i></b>                                              |    |                      |       |
| <b>Comfort level visiting an outpatient surgery clinic during COVID-19</b> |    |                      | 0.971 |

|                                                                    |    |                      |       |
|--------------------------------------------------------------------|----|----------------------|-------|
| Uncomfortable                                                      | 2  | 29.00 [27.50, 30.50] |       |
| Somewhat comfortable                                               | 7  | 30.00 [26.00, 32.50] |       |
| Neutral                                                            | 4  | 27.00 [25.50, 30.50] |       |
| Very Comfortable                                                   | 49 | 29.00 [24.00, 35.00] |       |
| <b>Overall concern undergoing elective surgery during COVID-19</b> |    |                      | 0.706 |
| Very Concerned                                                     | 1  | 25.00 [25.00, 25.00] |       |
| Concerned                                                          | 3  | 32.00 [24.50, 33.50] |       |
| Slightly Concerned                                                 | 28 | 27.50 [25.75, 30.50] |       |
| Not Concerned                                                      | 30 | 30.00 [24.25, 40.00] |       |

**SDC 1.** Associations between age and lifestyle changes, social media usage, and safety concerns during COVID-19. Analysis performed by Kruskal-Wallis tests by ranks. IQR = interquartile range.

**SDC 2**

| <b><i>Video conferencing for social purposes</i></b>         |                                    |                      |                      |                       |                                     |         |
|--------------------------------------------------------------|------------------------------------|----------------------|----------------------|-----------------------|-------------------------------------|---------|
| Variable                                                     | Significantly Decreased<br>(n = 1) | Decreased<br>(n = 2) | No Change<br>(n = 9) | Increased<br>(n = 21) | Significantly Increased<br>(n = 28) | p-value |
| <b>Camera awareness of new displeasing facial features</b>   |                                    |                      |                      |                       |                                     | 0.050   |
| No                                                           | 0 (0.0)                            | 2 (100.0)            | 6 (66.7)             | 18 (85.7)             | 14 (50.0)                           |         |
| Not Applicable                                               | 0 (0.0)                            | 0 (0.0)              | 1 (11.1)             | 0 (0.0)               | 1 (3.6)                             |         |
| Yes                                                          | 1 (100.0)                          | 0 (0.0)              | 2 (22.2)             | 3 (14.3)              | 13 (46.4)                           |         |
| <b>Camera awareness of known displeasing facial features</b> |                                    |                      |                      |                       |                                     | 0.304   |
| No                                                           | 0 (0.0)                            | 2 (100.0)            | 2 (22.2)             | 9 (42.9)              | 9 (32.1)                            |         |
| Not Applicable                                               | 0 (0.0)                            | 0 (0.0)              | 2 (22.2)             | 1 (4.8)               | 1 (3.6)                             |         |
| Yes                                                          | 1 (100.0)                          | 0 (0.0)              | 5 (55.6)             | 11 (52.4)             | 18 (64.3)                           |         |
| <b>On-camera time as a motivational factor to pursue FPS</b> |                                    |                      |                      |                       |                                     | 0.066   |
| No                                                           | 0 (0.0)                            | 2 (100.0)            | 4 (44.4)             | 17 (81.0)             | 17 (60.7)                           |         |
| Not Applicable                                               | 0 (0.0)                            | 0 (0.0)              | 3 (33.3)             | 1 (4.8)               | 1 (3.6)                             |         |

|                                                              |                                       |                      |                          |                           |                                        |         |
|--------------------------------------------------------------|---------------------------------------|----------------------|--------------------------|---------------------------|----------------------------------------|---------|
| Yes                                                          | 1 (100.0)                             | 0 (0.0)              | 2 (22.2)                 | 3 (14.3)                  | 10 (35.7)                              |         |
| <b>Video conferencing for occupational purposes</b>          |                                       |                      |                          |                           |                                        |         |
| Variable                                                     | Significantly<br>Decreased<br>(n = 0) | Decreased<br>(n = 2) | No<br>Change<br>(n = 12) | Increase<br>d<br>(n = 18) | Significantly<br>Increased<br>(n = 27) | p-value |
| <b>Camera awareness of new displeasing facial features</b>   |                                       |                      |                          |                           |                                        | 0.372   |
| No                                                           | 2 (100.0)                             |                      | 5 (41.7)                 | 14 (77.8)                 | 18 (66.7)                              |         |
| Not<br>Applicable                                            | 0 (0.0)                               |                      | 1 (8.3)                  | 0 (0.0)                   | 1 (3.7)                                |         |
| Yes                                                          | 0 (0.0)                               |                      | 6 (50.0)                 | 4 (22.2)                  | 8 (29.6)                               |         |
| <b>Camera awareness of known displeasing facial features</b> |                                       |                      |                          |                           |                                        | 0.204   |
| No                                                           | 2 (100.0)                             |                      | 3 (25.0)                 | 9 (50.0)                  | 8 (29.6)                               |         |
| Not<br>Applicable                                            | 0 (0.0)                               |                      | 2 (16.7)                 | 0 (0.0)                   | 2 (7.4)                                |         |
| Yes                                                          | 0 (0.0)                               |                      | 7 (58.3)                 | 9 (50.0)                  | 17 (63.0)                              |         |
| <b>On-camera time as a motivational factor to pursue FPS</b> |                                       |                      |                          |                           |                                        | 0.317   |

|                   |           |          |           |           |  |
|-------------------|-----------|----------|-----------|-----------|--|
| No                | 2 (100.0) | 5 (41.7) | 13 (72.2) | 20 (74.1) |  |
| Not<br>Applicable | 0 (0.0)   | 3 (25.0) | 1 (5.6)   | 1 (3.7)   |  |
| Yes               | 0 (0.0)   | 4 (33.3) | 4 (22.2)  | 6 (22.2)  |  |

**SDC 2.** Associations between video conferencing for social and occupational purposes and webcam usage. Associations were tested using Fisher's Exact test. Counts are presented with column percentages.

### SDC 3

| Variable                                                                             | Laptop eye level (No) (n = 26) | Laptop eye level (Yes) (n = 36) | p-value | Laptop desk level (No) (n = 49) | Laptop desk level (Yes) (n = 13) | p-value | Smartphone/ Tablet (No) (n = 15) | Smartphone/ Tablet (Yes) (n = 47) | p-value | Lighting (No) (n = 58) | Lighting (Yes) (n = 4) | p-value |
|--------------------------------------------------------------------------------------|--------------------------------|---------------------------------|---------|---------------------------------|----------------------------------|---------|----------------------------------|-----------------------------------|---------|------------------------|------------------------|---------|
| Camera awareness of new displeasing facial features                                  |                                |                                 | 0.441   |                                 |                                  | 0.328   |                                  |                                   | 0.128   |                        |                        | 0.204   |
| No                                                                                   | 15 (57.7)                      | 26 (72.2)                       |         | 30 (61.2)                       | 11 (84.6)                        |         | 7 (46.7)                         | 34 (72.3)                         |         | 40 (69.0)              | 1 (25.0)               |         |
| Not Applicable                                                                       | 1 (3.8)                        | 1 (2.8)                         |         | 2 (4.1)                         | 0 (0.0)                          |         | 1 (6.7)                          | 1 (2.1)                           |         | 2 (3.4)                | 0 (0.0)                |         |
| Yes                                                                                  | 10 (38.5)                      | 9 (25.0)                        |         | 17 (34.7)                       | 2 (15.4)                         |         | 7 (46.7)                         | 12 (25.5)                         |         | 16 (27.6)              | 3 (75.0)               |         |
| Camera awareness of known displeasing facial features                                |                                |                                 | 0.359   |                                 |                                  | 0.138   |                                  |                                   | 0.648   |                        |                        | 0.094   |
| No                                                                                   | 7 (26.9)                       | 16 (44.4)                       |         | 21 (42.9)                       | 2 (15.4)                         |         | 4 (26.7)                         | 19 (40.4)                         |         | 23 (39.7)              | 0 (0.0)                |         |
| Not Applicable                                                                       | 2 (7.7)                        | 2 (5.6)                         |         | 3 (6.1)                         | 1 (7.7)                          |         | 1 (6.7)                          | 3 (6.4)                           |         | 3 (5.2)                | 1 (25.0)               |         |
| Yes                                                                                  | 17 (65.4)                      | 18 (50.0)                       |         | 25 (51.0)                       | 10 (76.9)                        |         | 10 (66.7)                        | 25 (53.2)                         |         | 32 (55.2)              | 3 (75.0)               |         |
| On-camera time as a motivational factor to pursue FPS                                |                                |                                 | 0.719   |                                 |                                  | 0.620   |                                  |                                   | 0.319   |                        |                        | 0.079   |
| No                                                                                   | 16 (61.5)                      | 25 (69.4)                       |         | 31 (63.3)                       | 10 (76.9)                        |         | 8 (53.3)                         | 33 (70.2)                         |         | 40 (69.0)              | 1 (25.0)               |         |
| Not Applicable                                                                       | 3 (11.5)                       | 2 (5.6)                         |         | 5 (10.2)                        | 0 (0.0)                          |         | 1 (6.7)                          | 4 (8.5)                           |         | 5 (8.6)                | 0 (0.0)                |         |
| Yes                                                                                  | 7 (26.9)                       | 9 (25.0)                        |         | 13 (26.5)                       | 3 (23.1)                         |         | 6 (40.0)                         | 10 (21.3)                         |         | 13 (22.4)              | 3 (75.0)               |         |
| <u>During COVID-19 were you more/less aware of the following parts of your face?</u> |                                |                                 |         |                                 |                                  |         |                                  |                                   |         |                        |                        |         |
| Hair                                                                                 |                                |                                 | 1.000   |                                 |                                  | 1.000   |                                  |                                   | 0.267   |                        |                        | 0.609   |
| Less aware                                                                           | 0 (0.0)                        | 1 (2.8)                         |         | 1 (2.0)                         | 0 (0.0)                          |         | 1 (6.7)                          | 0 (0.0)                           |         | 1 (1.7)                | 0 (0.0)                |         |
| More aware                                                                           | 8 (30.8)                       | 11 (30.6)                       |         | 15 (30.6)                       | 4 (30.8)                         |         | 5 (33.3)                         | 14 (29.8)                         |         | 17 (29.3)              | 2 (50.0)               |         |
| Unchanged                                                                            | 18 (69.2)                      | 24 (66.7)                       |         | 33 (67.3)                       | 9 (69.2)                         |         | 9 (60.0)                         | 33 (70.2)                         |         | 40 (69.0)              | 2 (50.0)               |         |
| Eyes/brows                                                                           |                                |                                 | 0.714   |                                 |                                  | 1.000   |                                  |                                   | 0.548   |                        |                        | 0.381   |

|                 |           |           |       |           |          |       |          |           |       |           |          |       |
|-----------------|-----------|-----------|-------|-----------|----------|-------|----------|-----------|-------|-----------|----------|-------|
| Less aware      | 0 (0.0)   | 2 (5.6)   |       | 2 (4.1)   | 0 (0.0)  |       | 1 (6.7)  | 1 (2.1)   |       | 2 (3.4)   | 0 (0.0)  |       |
| More aware      | 10 (38.5) | 14 (38.9) |       | 19 (38.8) | 5 (38.5) |       | 5 (33.3) | 19 (40.4) |       | 21 (36.2) | 3 (75.0) |       |
| Unchanged       | 16 (61.5) | 20 (55.6) |       | 28 (57.1) | 8 (61.5) |       | 9 (60.0) | 27 (57.4) |       | 35 (60.3) | 1 (25.0) |       |
| Nose            |           |           | 0.503 |           |          | 0.372 |          |           | 0.349 |           |          | 0.653 |
| Less aware      | 0 (0.0)   | 1 (2.8)   |       | 1 (2.0)   | 0 (0.0)  |       | 1 (6.7)  | 0 (0.0)   |       | 1 (1.7)   | 0 (0.0)  |       |
| More aware      | 13 (50.0) | 22 (61.1) |       | 30 (61.2) | 5 (38.5) |       | 8 (53.3) | 27 (57.4) |       | 32 (55.2) | 3 (75.0) |       |
| Unchanged       | 13 (50.0) | 13 (36.1) |       | 18 (36.7) | 8 (61.5) |       | 6 (40.0) | 20 (42.6) |       | 25 (43.1) | 1 (25.0) |       |
| Lips            |           |           | 0.568 |           |          | 0.682 |          |           | 1.000 |           |          | 0.455 |
| Less aware      | 2 (7.7)   | 1 (2.9)   |       | 2 (4.2)   | 1 (7.7)  |       | 0 (0.0)  | 3 (6.5)   |       | 3 (5.3)   | 0 (0.0)  |       |
| More aware      | 10 (38.5) | 17 (48.6) |       | 22 (45.8) | 5 (38.5) |       | 7 (46.7) | 20 (43.5) |       | 24 (42.1) | 3 (75.0) |       |
| Unchanged       | 14 (53.8) | 17 (48.6) |       | 24 (50.0) | 7 (53.8) |       | 8 (53.3) | 23 (50.0) |       | 30 (52.6) | 1 (25.0) |       |
| Lower face/neck |           |           | 0.677 |           |          | 0.330 |          |           | 1.000 |           |          | 0.681 |
| Less aware      | 2 (7.7)   | 1 (2.9)   |       | 2 (4.3)   | 1 (7.7)  |       | 0 (0.0)  | 3 (6.5)   |       | 3 (5.4)   | 0 (0.0)  |       |
| More aware      | 9 (34.6)  | 11 (32.4) |       | 14 (29.8) | 6 (46.2) |       | 4 (30.8) | 16 (34.0) |       | 18 (32.1) | 2 (50.0) |       |
| Unchanged       | 15 (57.7) | 22 (64.7) |       | 31 (66.0) | 6 (46.2) |       | 9 (69.2) | 28 (59.6) |       | 35 (62.5) | 2 (50.0) |       |

**SDC 3.** Associations between type of video conferencing equipment used and motivation to pursue facial plastic surgery (FPS), changes in facial perception and facial subunit noticed. Associations were tested using Fisher's Exact tests.
